# Supplementary material
Source: HighWire-hosted journal article supplement (https://jpet.aspetjournals.org/highwire/filestream/150788/field_highwire_adjunct_files/1/898SupplTable.pdf)
Supplement: 898SupplTable.pdf [file 898SupplTable.pdf]

**TITLE: The Andrographolide analogue 3A.1 synergizes with Taxane derivatives in aggressive metastatic prostate cancers by upregulation of Heat Shock proteins and downregulation of MAT2A-mediated cell migration and invasion**

Taraswi Mitra Ghosh<sup>1</sup>, Teeratas Kansom<sup>1,2</sup>, Suman Mazumder<sup>1,4</sup>, Joshua Davis<sup>1</sup>, Ahmed S. Alnaim<sup>1</sup>, Shanese L. Jasper<sup>1</sup>, Chu Zhang<sup>1</sup>, Aedan Bird<sup>1</sup>, Praneet Opanasopit<sup>2</sup>, Amit K Mitra<sup>1,3,4</sup> and Robert D. Arnold<sup>1,3,\*</sup>

<sup>1</sup>Department of Drug Discovery & Development, Harrison School of Pharmacy, Auburn University, Auburn, AL, USA.

<sup>2</sup>Department of Pharmaceutical Technology, Faculty of Pharmacy, Silpakorn University, Thailand.

<sup>3</sup>University of Alabama at Birmingham O'Neal Comprehensive Cancer Center, Birmingham, AL, USA.

<sup>4</sup>Center for Pharmacogenomics and Single-Cell Omics Initiative, Auburn University, Auburn, AL, USA

**\*Corresponding Author:**

**Robert D. Arnold, Ph.D.**

Professor, Department of Drug Discovery & Development,  
Auburn University, Harrison School of Pharmacy  
Pharmaceutical Research Building  
720 South Donahue Drive, Rm. 257  
Auburn, AL 36849  
Phone: (334) 844-8434  
Email: rda0007@auburn.edu

| <b>Gene symbol</b> | <b>Fold change (3A.1 vs. No treatment)</b> | <b>Fold change (CBZ + 3A.1 vs. No treatment)</b> | <b>Fold change (DTX + 3A.1 vs. No treatment)</b> |
|--------------------|--------------------------------------------|--------------------------------------------------|--------------------------------------------------|
| <b>ACSM3</b>       | -13.28                                     | NA                                               | NA                                               |
| <b>AKR1C3</b>      | -10.57                                     | -14.14                                           | -12.31                                           |
| <b>ALDH3B1</b>     | -11.87                                     | -12.84                                           | -17.22                                           |
| <b>ALOXE3</b>      | 22.28                                      | NA                                               | 19.51                                            |
| <b>ANKRD1</b>      | 21.76                                      | 23.82                                            | 22.25                                            |
| <b>ARC</b>         | NA                                         | 45.56                                            | 40.52                                            |
| <b>ASIC1</b>       | NA                                         | NA                                               | -11.88                                           |
| <b>ATG16L2</b>     | NA                                         | -15.82                                           | NA                                               |
| <b>ATP8A1</b>      | -22.30                                     | -23.81                                           | -25.30                                           |
| <b>CELSR2</b>      | -11.43                                     | -13.73                                           | -13.68                                           |
| <b>CRYAB</b>       | 206.28                                     | 195.57                                           | 181.22                                           |
| <b>CSRP2</b>       | 20.03                                      | 20.81                                            | 20.05                                            |
| <b>CYP4F11</b>     | -26.26                                     | -19.74                                           | NA                                               |
| <b>DNAJB1</b>      | 25.01                                      | 30.04                                            | 26.57                                            |
| <b>DUSP5</b>       | 23.39                                      | 24.18                                            | 23.71                                            |
| <b>EGR1</b>        | -11.16                                     | NA                                               | NA                                               |
| <b>ELF3</b>        | -10.95                                     | -27.91                                           | -10.68                                           |
| <b>EPOR</b>        | NA                                         | NA                                               | -9.59                                            |
| <b>F2RL2</b>       | -12.24                                     | -18.26                                           | -16.00                                           |
| <b>FBN1</b>        | -11.79                                     | -12.83                                           | -11.81                                           |
| <b>GEM</b>         | NA                                         | 19.94                                            | NA                                               |
| <b>GXYLT2</b>      | -10.16                                     | -13.11                                           | -14.73                                           |
| <b>HMOX1</b>       | 59.20                                      | 55.14                                            | 58.94                                            |
| <b>HSPA6</b>       | 2510.81                                    | 2733.81                                          | 2444.27                                          |
| <b>HSPB1</b>       | 24.32                                      | 21.29                                            | 20.87                                            |
| <b>HSPH1</b>       | 24.13                                      | 26.41                                            | 23.21                                            |
| <b>IGFBP5</b>      | -25.14                                     | -68.63                                           | -32.05                                           |
| <b>KBTBD8</b>      | NA                                         | 20.61                                            | NA                                               |
| <b>LCP1</b>        | 53.02                                      | 46.95                                            | 53.85                                            |
| <b>MAFF</b>        | NA                                         | 20.82                                            | 20.14                                            |
| <b>MARCHF4</b>     | 35.17                                      | 32.31                                            | 34.05                                            |
| <b>MROH6</b>       | NA                                         | -12.44                                           | NA                                               |
| <b>NDNF</b>        | -11.30                                     | NA                                               | -13.63                                           |
| <b>NPNT</b>        | -41.23                                     | -29.80                                           | -29.38                                           |
| <b>NPR1</b>        | NA                                         | NA                                               | -9.69                                            |
| <b>PDGFD</b>       | -14.55                                     | NA                                               | -10.08                                           |
| <b>PGF</b>         | 38.22                                      | 38.85                                            | 36.37                                            |
| <b>PKIB</b>        | 28.40                                      | 28.56                                            | 25.66                                            |
| <b>PLEKHO1</b>     | 19.93                                      | NA                                               | NA                                               |

|                 |        |        |        |
|-----------------|--------|--------|--------|
| <b>PLIN2</b>    | 22.47  | NA     | 20.56  |
| <b>PTGES</b>    | -9.90  | -14.82 | -10.26 |
| <b>RAB3D</b>    | NA     | NA     | -9.74  |
| <b>RAP1GAP</b>  | -15.12 | -13.67 | -15.75 |
| <b>RNF207</b>   | NA     | -15.20 | NA     |
| <b>RNF43</b>    | NA     | NA     | -11.27 |
| <b>RPLP0P2</b>  | 91.84  | 85.45  | 87.96  |
| <b>S1PR5</b>    | -10.96 | -19.18 | -12.31 |
| <b>SELENOP</b>  | -11.91 | -15.04 | NA     |
| <b>SEMA4G</b>   | NA     | -24.57 | -13.14 |
| <b>SERPIND1</b> | 27.27  | 21.94  | 29.57  |
| <b>SESN2</b>    | 26.87  | 27.25  | 26.34  |
| <b>SHANK1</b>   | 19.97  | NA     | NA     |
| <b>SLC4A8</b>   | NA     | -15.04 | NA     |
| <b>SPHK1</b>    | 43.10  | 45.45  | 42.68  |
| <b>SPNS2</b>    | 37.85  | 31.86  | 32.60  |
| <b>SPOCD1</b>   | 25.10  | NA     | 21.27  |
| <b>SPRY4</b>    | 25.74  | 28.46  | 24.86  |
| <b>SPTB</b>     | NA     | 26.43  | NA     |
| <b>TAS1R3</b>   | -18.08 | -18.70 | -17.34 |
| <b>TGFB3</b>    | -26.50 | -33.39 | -22.37 |
| <b>TMEM8B</b>   | -10.10 | NA     | NA     |
| <b>TNS2</b>     | NA     | -13.55 | NA     |
| <b>TXNIP</b>    | -13.19 | -18.11 | -13.59 |
| <b>VWA7</b>     | -9.74  | NA     | NA     |
| <b>XXYL1</b>    | -10.63 | NA     | NA     |
| <b>ZFAND2A</b>  | 29.48  | 33.81  | 28.18  |
| <b>ZNF467</b>   | NA     | -14.99 | -12.55 |

Supplementary Table 1 Top differentially expressed genes (DEGs) in Taxane resistant mCRPC cell line (DUTXR). Fold change compared to the untreated group for each cell line. Following 48 h of 3A.1, 3A.1+DTX, and 3A.1+CBZ treatment in DUTXR (taxane resistant AI-mCRPC/NEPC) cell lines. Fold change cut-off value is >1.5.
